# Supplementary material for: Stochastic reconstruction of spatio-temporal rainfall patterns by inverse hydrologic modelling
Source: Copernicus journal article supplement (doi:10.5194/hess-23-225-2019), 2019-01-16
Supplement: Supplementary file 1 [file hess-23-225-2019-supplement.pdf]

Supplement of Hydrol. Earth Syst. Sci., 23, 225–237, 2019  
<https://doi.org/10.5194/hess-23-225-2019-supplement>  
© Author(s) 2019. This work is distributed under  
the Creative Commons Attribution 4.0 License.

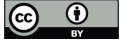

*Supplement of*

## **Stochastic reconstruction of spatio-temporal rainfall patterns by inverse hydrologic modelling**

**Jens Grundmann et al.**

*Correspondence to:* Jens Grundmann ([jens.grundmann@tu-dresden.de](mailto:jens.grundmann@tu-dresden.de))

The copyright of individual parts of the supplement might differ from the CC BY 4.0 License.

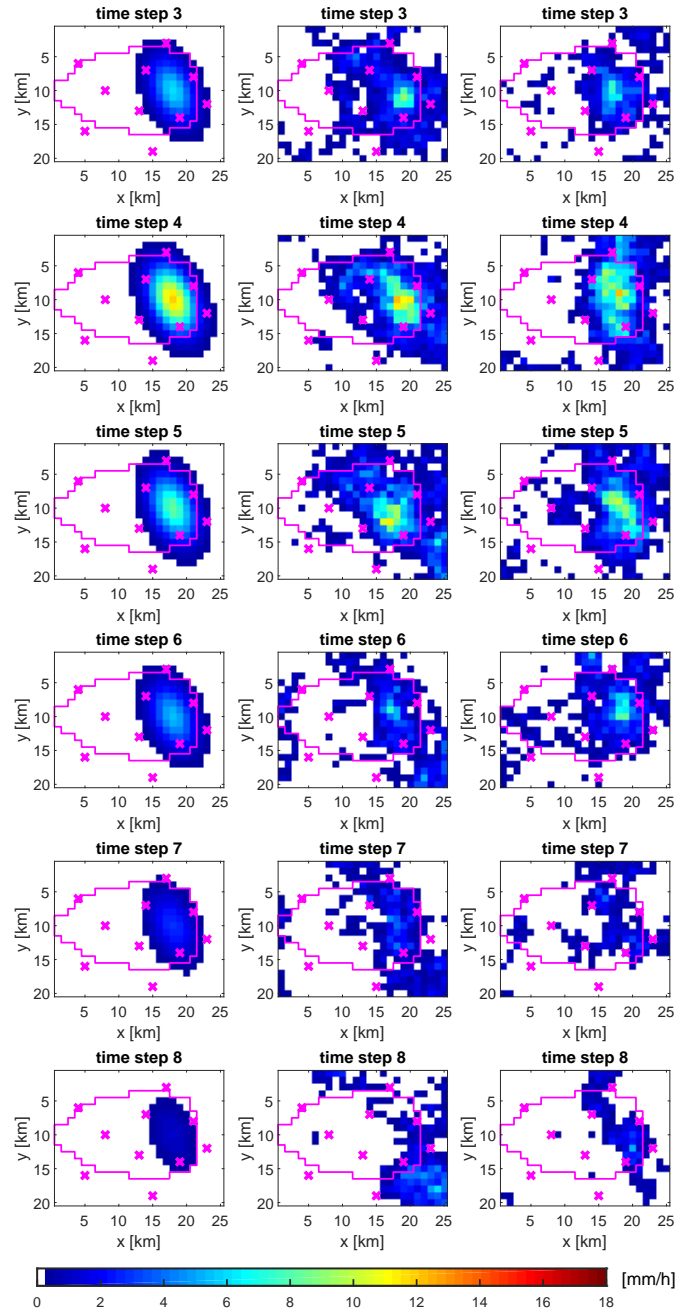

**Figure S1.** Comparison of spatial rainfall amounts per time step by the synthetic observation (left column) and two selected realisations with similar event statistics (central and right column). The spatial rainfall amounts per event of these two realisations are displayed in Figure 9 e) and f). Displayed time steps are in accordance with Figure 4.

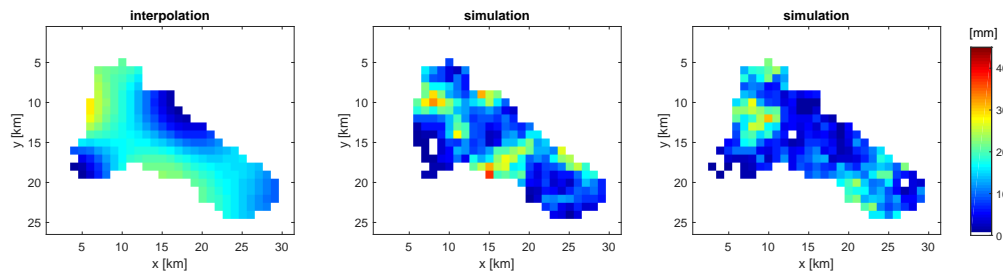

**Figure S2.** Spatial rainfall amounts per event for the real case study shown by the interpolation result (left figure) and two selected realisations with similar performance in resulting runoff obtained by the inverse modelling approach for simulating spatio-temporal rainfall pattern (middle and right figure).
